# Supplementary material for: Waste Nelumbo nucifera (lotus) stem-floral biomass-assisted enhanced and sustainable photocatalytic hydrogen generation
Source: Royal Society of Chemistry journal article supplement (doi:10.1039/d5nj04414f), 2026-01-01
Supplement: d5nj04414f1.pdf [file d5nj04414f1.pdf]

**Supplementary Information for**  
**Nelumbo Nucifera (Lotus)-Floral Waste assisted Enhanced and Sustainable**  
**Photocatalytic Hydrogen Generation**

Swagata Das<sup>a</sup> and Kajari Kargupta<sup>\*a</sup>

<sup>a</sup>Chemical Engineering Department, Jadavpur University, Kolkata, India-700032

\*Corresponding author: kajari.kargupta@jadavpuruniversity.in, karguptakajari2011@gmail.com

**S1. Physiochemical characterizations**

All the physiochemical properties of the NN-ZnO powder samples have been characterized using several characterization tools. The crystallinity and morphology of the materials have been examined using XRD (X'Pert3 powder and Empyrean, PANalytical), SEM-EDX (Hitachi S-3400, 15.0 KV, WD: 5.5 mm) and HR-TEM and SAED pattern (JEOL F-200 multipurpose electron microscope; 200 kV). The zeta potential and particle size of the samples have been measured in a disposable folded capillary cell on a Malvern Zetasizer Nano Z zeta potential analyzer. The chemical bonds of the materials have been investigated using FTIR (PerkinElmer Spectrum-2 Imaging System). The optical properties of the materials have been examined using UV-Vis (Perkin Elmer Lambda 365 UV/ Vis Spectrophotometer) in the wavelength range of 200-800 nm and photoluminescence spectra have been investigated using Horiba FluoroMax Plus (1700 nm, 25 ps). X-ray Photo electron Spectroscopy (XPS) with Al Ka irradiation have been used to study the surface elemental interactions using Model AXIS Supra. The nitrogen adsorption and desorption isotherms, specific surface area and porosity characteristics of samples have been obtained to identify the surface area using porosity analyzer (Quantachrome TouchWin) at 77.3 K. The specific surface area has been evaluated by Brunauer-Emmett-Teller (BET). Thermogravimetric analysis has been performed on PerkinElmer TGA 4000 at a scan rate of 20°C up to a temperature of 850°C.

**Table S1** Details of solar simulator

|                                   |                              |                                    |
|-----------------------------------|------------------------------|------------------------------------|
| Newport Oriel LCS-100 (Class ABB) | Lamp type                    | Xenon 100 W                        |
|                                   | Output beam size             | 38 x 38 mm                         |
|                                   | Beam divergence, half angle  | <6°                                |
|                                   | Typical output power         | 1.0 sun (100 mW/ cm <sup>2</sup> ) |
|                                   | Output intensity measurement | Newport 843-R                      |

## S2. Additional results

### XRD analysis

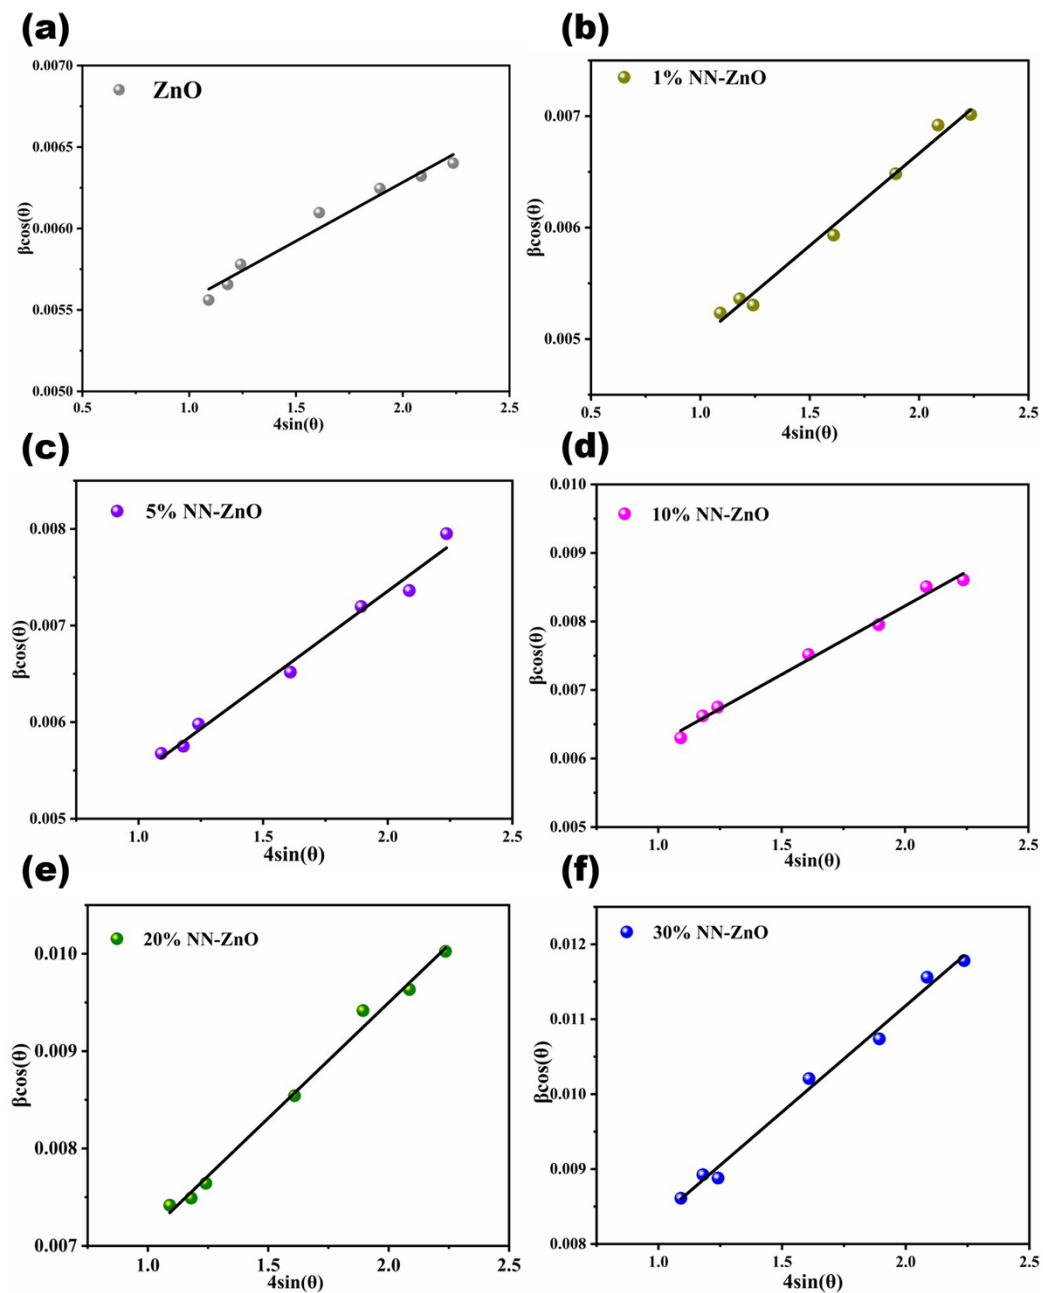

**Fig. S1.** W-H plots of all the percentage variations of NN-ZnO along with pristine ZnO.

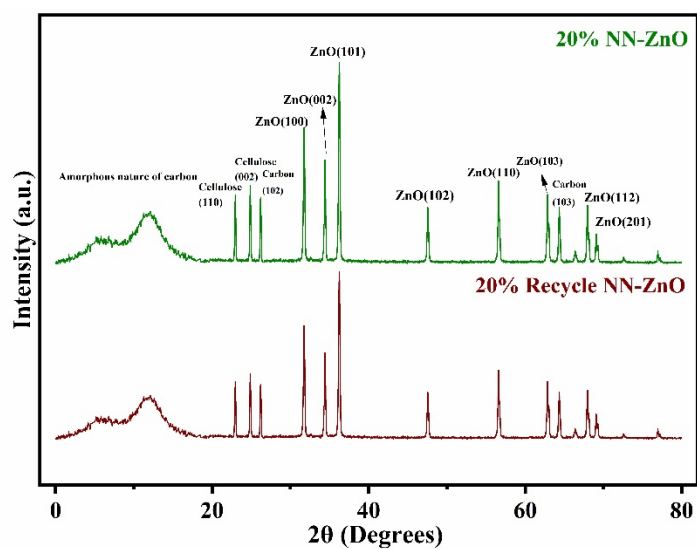

**Fig. S2.** Comparison analysis between XRD plots of fresh and used photocatalyst after 4-consecutive hydrogen generation cycles

**Table S2** Average particle size calculation using Scherrer's equation

| $K$  | $\lambda$<br>(nm) | Peak<br>position<br>$2\theta$ ( $^\circ$ ) | $FWHM \beta$<br>( $^\circ$ ) | $FWHM \beta$<br>(radian) | $\cos^2(\frac{2\theta}{2})$ | D<br>(nm) | $\theta$ | Average<br>D<br>(nm) |
|------|-------------------|--------------------------------------------|------------------------------|--------------------------|-----------------------------|-----------|----------|----------------------|
| 0.94 | 0.15406           | 31.659                                     | 0.1489                       | 0.0026                   | 0.962                       | 57.950    | 15.83    | 45.56                |
|      |                   | 34.315                                     | 0.1582                       | 0.0028                   | 0.955                       | 54.920    | 17.16    |                      |
|      |                   | 36.148                                     | 0.1641                       | 0.0029                   | 0.951                       | 53.215    | 18.07    |                      |
|      |                   | 47.442                                     | 0.2009                       | 0.0035                   | 0.916                       | 45.135    | 23.72    |                      |
|      |                   | 56.506                                     | 0.2287                       | 0.0040                   | 0.881                       | 41.209    | 28.25    |                      |
|      |                   | 62.883                                     | 0.2956                       | 0.0052                   | 0.853                       | 32.917    | 31.44    |                      |
|      |                   | 67.973                                     | 0.2978                       | 0.0052                   | 0.829                       | 33.620    | 33.99    |                      |

## SAED pattern analysis

**Table S3** Value of d-spacing and indexing results of SAED patterns analysis

| Serial number | $1/D$<br>( $\text{nm}^{-1}$ ) | $1/r$<br>( $\text{nm}^{-1}$ ) | $r$<br>( $\text{nm}$ ) | d-spacing<br>( $\text{\AA}$ ) | ( $hkl$ ) |
|---------------|-------------------------------|-------------------------------|------------------------|-------------------------------|-----------|
| 1             | 7.091                         | 3.545                         | 0.282                  | 2.820                         | (100)     |
| 2             | 7.677                         | 3.838                         | 0.261                  | 2.605                         | (002)     |
| 3             | 8.105                         | 4.052                         | 0.247                  | 2.468                         | (101)     |
| 4             | 10.456                        | 5.228                         | 0.191                  | 1.913                         | (102)     |
| 5             | 12.347                        | 6.173                         | 0.162                  | 1.619                         | (110)     |
| 6             | 13.540                        | 6.770                         | 0.148                  | 1.478                         | (103)     |
| 7             | 14.485                        | 7.242                         | 0.138                  | 1.381                         | (112)     |
| 8             | 14.762                        | 7.381                         | 0.135                  | 1.355                         | (201)     |

## Particle size and zeta potential

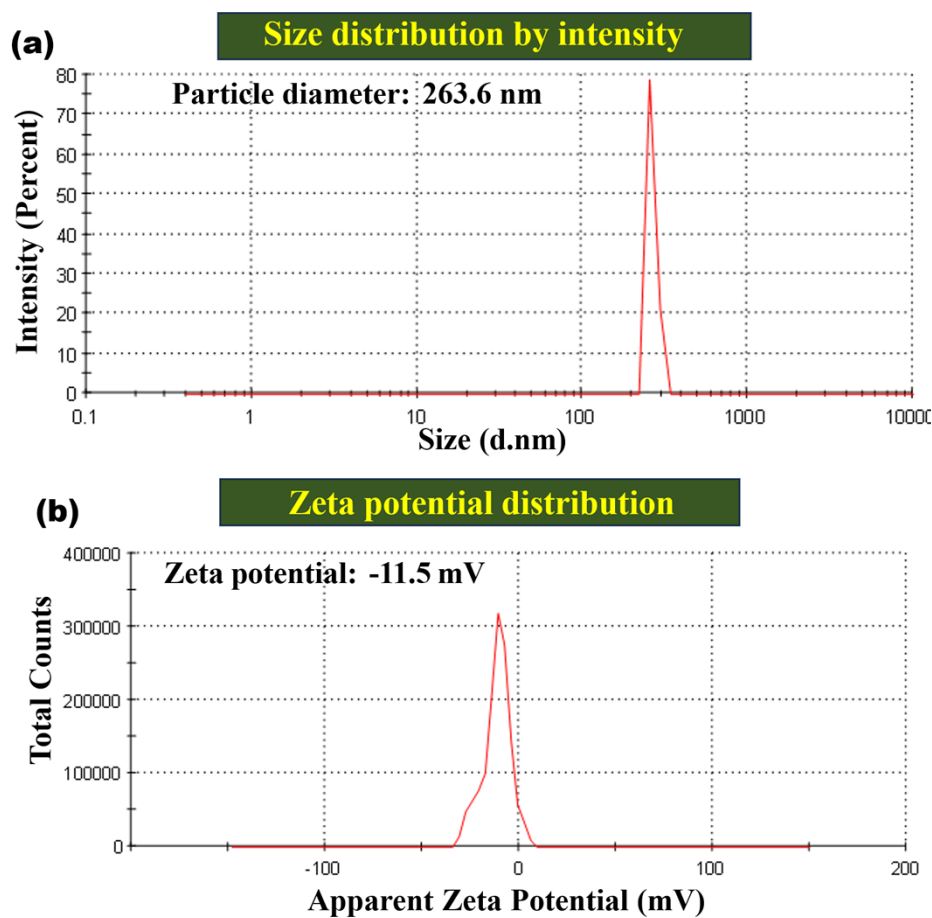

**Fig. S3.** (a) Particle size, (b) Zeta potential of NN-ZnO

## Electrochemical impedance spectroscopy (EIS) analysis

**Table S4** Summary of Electrochemical impedance spectroscopy (EIS) analysis.

### (a) For 20% NN-ZnO

| Parameter                 | Value                 |
|---------------------------|-----------------------|
| $R_1 (\Omega)$            | 8.321                 |
| $R_2 (\Omega)$            | 8.528                 |
| $CPE-T (F \cdot s^{n-1})$ | $2.06 \times 10^{-3}$ |
| $CPE-P (n)$               | 0.647                 |
| $W_1-R (\Omega)$          | 3.583                 |
| $W_1-T (s^{1/2})$         | $2.82 \times 10^{-4}$ |
| $W_1-P$                   | 0.392                 |

### (b) For ZnO

| Parameter                 | Value                 |
|---------------------------|-----------------------|
| $R_1 (\Omega)$            | 10.34                 |
| $R_2 (\Omega)$            | 13.81                 |
| $CPE-T (F \cdot s^{n-1})$ | $2.84 \times 10^{-3}$ |
| $CPE-P (n)$               | 0.687                 |
| $W_1-R (\Omega)$          | 2.55                  |
| $W_1-T (s^{1/2})$         | $8.69 \times 10^{-4}$ |
| $W_1-P$                   | 0.405                 |

## Photocatalytic Hydrogen generation

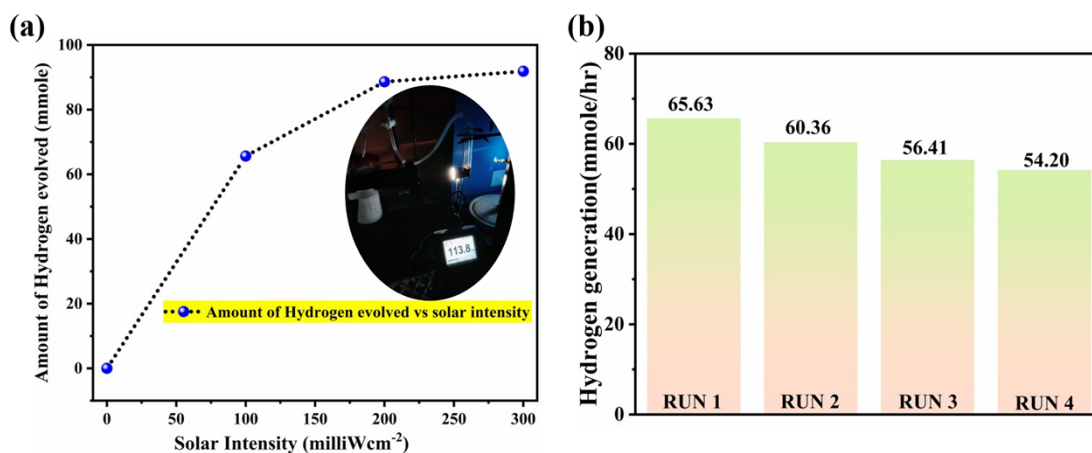

Fig. S4 (a) Variations of  $H_2$  evolution over 6 hrs versus solar intensity, (b) Changes in  $H_2$  evolution (mmole/hr) after 4 consecutive runs.

**Table S5** Comparison of various aspects related to hydrogen generation using (NN+ZnO) mixture and NN-ZnO nanohybrid.

| Aspect                   | Mixture (Biomass + ZnO + Water + Ethanol)                                                                          | Nanohybrid (Biomass–ZnO Composite)                                                                   |
|--------------------------|--------------------------------------------------------------------------------------------------------------------|------------------------------------------------------------------------------------------------------|
| State of biomass         | Raw organic polymers (cellulose, lignin, etc.)                                                                     | Biomass (carbonaceous, aromatic, conductive)                                                         |
| Role of biomass          | Hole scavenger (sacrificial donor); Supports ZnO particles physically                                              | Co-catalyst; Conductive electron mediator; Visible-light absorber                                    |
| Bonding with ZnO         | Weak physical adsorption / chelation                                                                               | Strong anchoring, Zn–O–C linkages                                                                    |
| Electron transport       | Very poor (insulating)                                                                                             | Excellent (conductive carbon network)                                                                |
| Light absorption         | Mainly UV (from ZnO only)                                                                                          | UV + visible (biomass broadens absorption)                                                           |
| Charge separation        | Low (fast recombination of $e^-$ - $h^+$ )                                                                         | High (biomass extracts and stores $e^-$ )                                                            |
| Surface area or porosity | Moderate (raw biomass)                                                                                             | High (biomass has porous structure)                                                                  |
| Hydrogen generation      | Low as driven only by ZnO, aided by ethanol or biomass hole scavenging                                             | High as synergistic ZnO–biomass heterojunction drives strong $H_2$ evolution                         |
| Main reactions           | ZnO photoexcites $\rightarrow e^- + h^+$ ; biomass or ethanol consume $h^+$ ; water provides $H^+ \rightarrow H_2$ | ZnO photoexcites $e^-$ transfer to biomass $e^-$ reduce $H^+ \rightarrow H_2$<br>$h^+$ oxidize water |

### S3. Estimation of cost for Nelumbo Nucifera biomass with ZnO

**Basis:** 0.5 gm photocatalyst, 1 day/24 hrs operation (4 cycles of each 6 hrs operations considering recyclability of the catalysts). The cost is normalized with the production rate ( $\text{mmole}/\text{gm}_{\text{cat}}\text{day}$ ) in order to assess the cost effectiveness and benefits.

**Table S6** Solar  $H_2$  generation by pristine ZnO photocatalyst (base case):

|                                                                   | Chemicals                          | Approx. quantity            | Cost (\$)                                 |
|-------------------------------------------------------------------|------------------------------------|-----------------------------|-------------------------------------------|
| Chemicals                                                         | Zinc oxide                         | 0.5 gm                      | 0.0015                                    |
|                                                                   | Deionized water                    | 50 ml                       | 00.00                                     |
|                                                                   | Ethanol                            | 20 ml                       | 0.0144                                    |
| Electricity involved                                              | Stirring                           | 4 hrs (2.2 KWh)             | 0.264                                     |
|                                                                   | Hydrothermal/<br>calcination       | 6 hrs (9 KWh)               | 1.08                                      |
|                                                                   | Drying                             | 2 hrs (4 KWh)               | 0.48                                      |
| $H_2$ generation performance in presence of solar simulator       |                                    |                             |                                           |
| Chemicals                                                         | Sodium sulfide                     | 1 ml                        | 0.00087                                   |
| Electricity involved                                              | Ultra- sonication                  | 0.5 hr (0.05 KWh)           | 0.006                                     |
|                                                                   | Solar simulator                    | 24 hrs (2.4 KWh) (4 cycles) | 0.288                                     |
| Total                                                             |                                    |                             | 2.1348                                    |
| Amount of $H_2$ evolution in 4 cycles (refer recyclability table) |                                    |                             | 72.32 mmole (1day)                        |
| Normalized cost per photocatalytic activity                       | $Total\ cost/mmole\ gm_{cat}^{-1}$ |                             | $\$0.0295/mmole\ gm_{cat}^{-1}\ day^{-1}$ |

**Table S7** Solar  $H_2$  generation by NN-ZnO photocatalyst

The cost estimated of NN-ZnO photocatalyst to  $H_2$  generation are depicted below:

|                                                                   | Chemicals                                          | Approx. quantity            | Cost (\$)                                  |
|-------------------------------------------------------------------|----------------------------------------------------|-----------------------------|--------------------------------------------|
| Pre-processing of NN stems                                        |                                                    |                             |                                            |
| Floral waste                                                      | Waste (NN stems)                                   | 1 kg (approx.)              | Waste                                      |
| Electricity involved                                              | Freeze drying<br>(vacuum pump, refrigeration etc.) | 12 hrs (10 KWh)             | 1.2                                        |
|                                                                   | Drying                                             | 12 hrs (14.4 KWh)           | 1.728                                      |
| Total amount of NN biomass powder extracted (from 1 kg)           |                                                    | 25 gm                       | 2.928                                      |
| Synthesis of NN-ZnO                                               |                                                    |                             |                                            |
| Chemicals                                                         | Fine NN powder                                     | 0.1 gm                      | 0.0117                                     |
|                                                                   | Deionized water                                    | 50 ml                       | 00.00                                      |
|                                                                   | Zinc oxide                                         | 0.5 gm                      | 0.0015                                     |
|                                                                   | Ethanol                                            | 20 ml                       | 0.0144                                     |
|                                                                   | Sodium hydroxide                                   | 8 gm                        | 0.11                                       |
| Electricity involved                                              | Stirring                                           | 6 hrs (3.3 KWh)             | 0.396                                      |
|                                                                   | Hydrothermal/<br>calcination                       | 14 hrs (21 KWh)             | 2.52                                       |
|                                                                   | Drying                                             | 1 hr (2 KWh)                | 0.24                                       |
| $H_2$ generation performance in presence of solar simulator       |                                                    |                             |                                            |
| Chemicals                                                         | Sodium sulfide                                     | 1 ml                        | 0.00087                                    |
| Electricity involved                                              | Ultra-sonication                                   | 0.5 hr (0.05 KWh)           | 0.006                                      |
|                                                                   | Solar simulator                                    | 24 hrs (2.4 KWh) (4 cycles) | 0.288                                      |
| Total                                                             |                                                    |                             | 3.5885                                     |
| Amount of $H_2$ evolution in 4 cycles (refer recyclability table) |                                                    |                             | 236.6 mmole (1day)                         |
| Normalized cost per photocatalytic activity                       | $Total\ cost/mmole\ gm_{cat}^{-1}\ day$            |                             | $\$0.01516/mmole\ gm_{cat}^{-1}\ day^{-1}$ |
